# Giving birth in a Pandemic: Women's Birth Experiences in England during COVID-19

**Short title:** England birth experiences and COVID-19.

Ezra Aydin, PhD<sup>1</sup>, Kevin A. Glasgow, MPhil<sup>2</sup>, Staci M. Weiss, PhD<sup>1</sup>, Zahra Khan, BSc<sup>1</sup>,  
Topun Austin, MD<sup>3,4</sup>, Mark H. Johnson, PhD<sup>1,6</sup>, Jane Barlow, DPhil<sup>5\*</sup> &  
Sarah Lloyd-Fox, PhD<sup>1\*</sup>

<sup>1</sup>Department of Psychology, University of Cambridge, UK.

<sup>2</sup>Department of Education, University of Cambridge, UK.

<sup>3</sup>Neonatal Intensive Care Unit, Cambridge University Hospitals NHS Foundation Trust, Cambridge, UK.

<sup>4</sup>NIHR Cambridge Biomedical Research Centre, Cambridge, UK.

<sup>5</sup>Centre for Evidence-Based Intervention, Department of Social Policy and Intervention, University of Oxford, UK.

<sup>6</sup>Centre for Brain & Cognitive Development, Birkbeck, University of London, UK

\*Joint senior authors

Total word count (without references): 4756

Total table count: 3

Total figure count: 2

**Correspondence to:** Ezra Aydin, Department of Psychology, University of Cambridge, Downing Street, Cambridge, CB2 3EB, UK. Email: [ea420@cam.ac.uk](mailto:ea420@cam.ac.uk) Telephone: +44 (0) 1223 465 222

## Abstract

**Background:** Expectant parents worldwide have experienced changes in the way they give birth as a result of COVID-19, including restrictions relating to access to birthing units and the presence of birthing partners during the birth, and changes to birth plans. This paper reports the experiences of women in England.

**Methods:** Data were obtained from both closed- and open-ended responses collected as part of the national COVID in Context of Pregnancy, Infancy and Parenting (CoCoPIP) Study online survey (n = 477 families) between 15<sup>th</sup> July 2020 – 29<sup>th</sup> March 2021. Frequency data are presented alongside the results of a sentiment analysis; the open-ended data was analysed thematically.

**Results:** Two-thirds of expectant women reported giving birth via spontaneous vaginal delivery (SVD) (66.1%) and a third via caesarean section (CS) (32.6%) or ‘other’ (1.3%). Just under half (49.7%) of the CS were reported to have been elective/planned, with 47.7% being emergencies. A third (37.4%) of participants reported having no changes to their delivery, with a further 25% reporting COVID-related changes, and 37.4% reporting non-COVID related changes (e.g., medical intervention). Experiences of COVID-related changes included limited birthing options and reduced feelings of control; difficulties accessing pain-relief and assistance, and feelings of distress and anxiety. Under half of the respondents reported not knowing whether there could be someone present at the birth (44.8%), with 2.3% of respondents reporting no birthing partner being present due to COVID-related restrictions. Parental experiences of communication and advice provided by the hospital prior to delivery were mixed, with significant stress and anxiety being reported in relation to both the fluctuating guidance and lack of certainty regarding the presence of birthing partners at

the birth. The sentiment analysis revealed that participant experiences of giving birth during the pandemic were predominately negative (46.9%) particularly in relation to the first national lockdown, with a smaller proportion of positive (33.2%) and neutral responses (19.9%).

**Conclusion:** Parents reported an overall increase in birthing interventions (e.g., emergency CS), increased uncertainties related to the birth, and poor communication, leading to increased feelings of anxiety and high levels of negative emotions. The implications of these findings are discussed.

**Key words:** birth experience; COVID-19; thematic analysis; pregnancy; England

## 1 Introduction

2 In January 2020 the first case of COVID-19 in the UK was confirmed, and on the 23<sup>rd</sup> of  
3 March 2020 a national lockdown was announced. For this and two later national lockdowns  
4 in England, all non-essential businesses were closed, and people were required to stay at  
5 home, being permitted to leave for essential purposes only (e.g., medical workers) (see  
6 *Figure 1* for timeline and dates of restrictions and guidelines in England).

7

8 *Figure 1: Timeline of restrictions and guidelines\* imposed by the government between*  
9 *March 2020-March 2021*

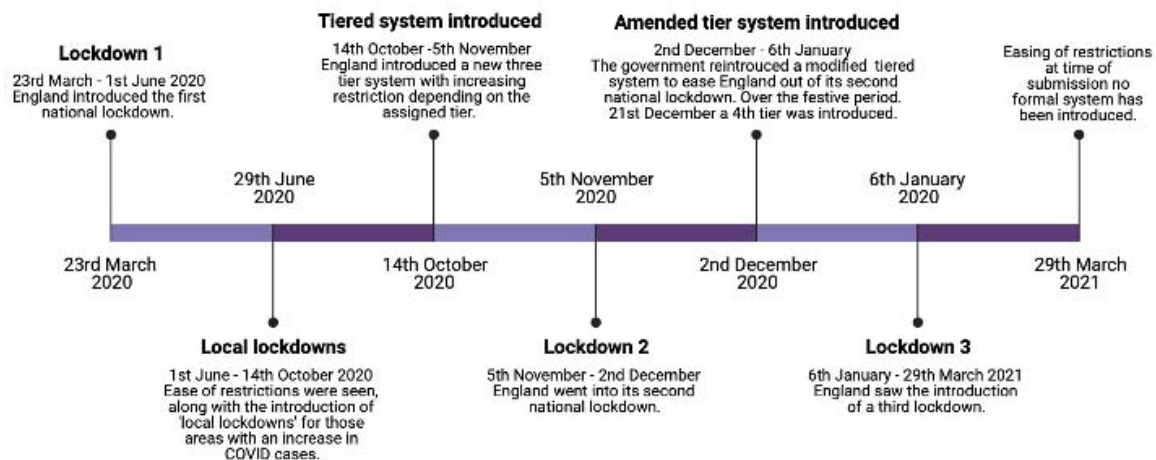

10

11 \* It is important to note that some areas in England may have seen a slight alteration in between national guidance and restrictions rules in his time  
12 period.

13

14 Throughout the pandemic, pregnancy and childbirth have been associated with anxiety and  
15 uncertainty for many pregnant women and their partners due in part to the changing  
16 landscape of the healthcare system and increased demands on healthcare providers. This has  
17 resulted in a number of best practices endorsed by the World Health Organising (WHO)  
18 being side-lined as evidenced by reports of women giving birth alone (San Francisco: Human  
19 Rights in Childbirth, 2020; Walsh et al., 2020), restrictions being imposed on birthing options

20 (e.g., no water births) (Greenfield et al., 2021; Nelson & Romanis, 2020)), and separation  
21 from their baby shortly after birth (San Francisco: Human Rights in Childbirth, 2020).

22

23 In the UK, government guidelines aimed at curbing the spread of the virus also led to a  
24 number of suboptimal conditions for expectant parents giving birth. In March 2020, National  
25 Health Service (NHS) trusts began to suspend home birth services and support in response to  
26 the COVID-19 outbreak (Davis, 2020). This was the result of a shortage in the number of  
27 midwives and maternity support workers (i.e., The Royal College of Midwives (RCM)  
28 reported a doubling in the shortage of midwives since the start of the COVID-19 outbreak -  
29 Royal College of Midwives, 2020; Sherwood, 2020), the diversion of resources to the  
30 pandemic, and ambulance shortages. Due to the suspension of NHS-supported home birth  
31 services, the RCM reported a surge in expectant women removing themselves from NHS  
32 antenatal care and a spike in private midwifery services, with increased numbers of expectant  
33 parents avoiding routine and obstetric care in hospitals (Davis, 2020). One study showed that  
34 between April and July 2020, one in 20 expectant women were considering giving birth  
35 without a doctor or midwife present ('freebirth') in the UK, 3% higher than recorded in 2019  
36 (Greenfield et al., 2021). This qualitative study attributed the increased demand for  
37 'freebirths' to wanting to avoid hospitals, fewer choices in terms of birth preferences (e.g.,  
38 having a birthing partner present), and practical problems (e.g., inability to use public  
39 transport) (Greenfield et al., 2021; Nelson & Romanis, 2020).

40

41 From the beginning of the pandemic, individual NHS trusts were required to draw up their  
42 own guidance with regard to access to maternity services and birth partners, based on  
43 government guidelines. Most commonly, the guidance stated that partners were only allowed  
44 to be present when the mother was 4cm dilated, that they were not allowed to be present at

45 the start of an induction and were not allowed to join their partners during the pre-operation  
46 preparation for a caesarean section (CS); and that they were to leave shortly after the birth  
47 (Regan, 2020). A survey of 15,000 new and expectant women conducted by the UK-based  
48 charity ‘Pregnant then Screwed’ between 16-18<sup>th</sup> July 2020 found that 90% reported hospital  
49 restrictions to have had a negative impact on their mental health, with 97% reporting these  
50 restrictions to have also increased their anxieties related to childbirth. Furthermore, just  
51 under a fifth (17.4%) of respondents reported feeling ‘forced’ to have a vaginal examination  
52 whilst in labour with 82% feeling this was a requirement if they were to have their birthing  
53 partner join them during the delivery.

54

55 On the 8<sup>th</sup> September 2020, NHS England issued guidance to individual NHS trusts “to  
56 reintroduce access for partners, visitors and other supporters of pregnant women in English  
57 maternity services” (Royal College of Obstetricians and Gynaecologists et al., 2020).  
58 However, the Guardian reported that only around 23% of trusts during this period allowed  
59 partners to be in attendance for the duration of the labour (Topping & Duncan, 2020),  
60 suggesting this guidance was applied inconsistently across trusts. In December 2020 this  
61 guidance was further revised to explicitly allow in-person support for expectant women  
62 throughout their maternity journey. This was inclusive of antenatal visits, ultrasound scans,  
63 and during the birth (NHS, 2020).

64

65 The COVID-19 in the Context of Pregnancy, Infant Parenting (CoCoPIP) Study was  
66 developed to explore how COVID-19 and the cascade of changes in healthcare, social  
67 restrictions and government guidance impacted the lives of families who were expecting a  
68 baby or had recently given birth (Aydin, Weiss, et al., 2021). Previously, data collected from  
69 the Context of Pregnancy, Infancy and Parenting (CoCoPIP) study was used to qualitatively

70 explore expectant family's perceptions of their healthcare appointments, health and social  
71 support in the UK during the pandemic (Aydin, Glasgow, et al., 2021). The aim of the current  
72 analysis was to explore parent's experiences of giving birth during COVID-19, including the  
73 ways in which communication and advice provided by hospitals may have influenced these  
74 experiences.

## 75 **Methods**

### 76 *Participants*

77 Survey data was taken from the period 15<sup>th</sup> July 2020 – 29<sup>th</sup> March 2021 (n = 477, see *Table*  
78 *1* for demographic and birth information). Recruitment strategies included the distribution of  
79 information nationwide to antenatal and postnatal health groups, social media platforms  
80 (Twitter, Facebook and Instagram), as well as other child development research groups and  
81 networks in the UK. Eligibility criteria for the study included expectant parents past their first  
82 trimester, or parents of an infant between the ages of 0-6 months, who were then asked to  
83 report on experiences during their recent pregnancy. Women who gave birth prior to the first  
84 national lockdown (23<sup>rd</sup> March 2020), were excluded from the final analysis. Additionally,  
85 due to the differences in timings with regard to the guidance issued across England, Wales  
86 and Scotland, only those families who lived in England at time of birth were included in the  
87 final sample. These were identified by the postcode participants provided at time of  
88 completing the survey. All participating parents gave informed consent to take part in the  
89 CoCoPIP online survey ([tinyurl.com/CoCoPIP](https://tinyurl.com/CoCoPIP)) (Aydin, Weiss, et al., 2021). Ethics approval  
90 for the survey was given by the University of Cambridge, Psychology Research Ethics  
91 Committee (PREC) (PRE.2020.077).

92

93

94 *Table 1: Participant demographic information*

| Demographic                                 | n   |
|---------------------------------------------|-----|
| <b>Who</b>                                  |     |
| Mother                                      | 436 |
| Father                                      | 7   |
| Non-birth Mother                            | 1   |
| Other partner                               | 0   |
| Missing                                     | 33  |
| <b>Ethnicity</b>                            |     |
| White                                       | 408 |
| Black                                       | 13  |
| Asian                                       | 7   |
| Mixed/Multiple                              | 15  |
| Hispanic                                    | 0   |
| Arab                                        | 0   |
| Other                                       | 1   |
| Undisclosed                                 | 1   |
| <b>Gestational age at birth</b>             |     |
| Very preterm (<32 weeks)                    | 3   |
| Moderately preterm (32 – 33 weeks + 6 days) | 8   |
| Late preterm (34 – 36 weeks + 6 days)       | 21  |
| Early term (37 – 38 weeks + 6 days)         | 100 |
| Full term (39 – 41 weeks and 6 days)        | 321 |
| Post term (>42 weeks)                       | 24  |
| <b>Delivery method</b>                      |     |
| Spontaneous vaginal delivery (SVD)          | 316 |
| C-section                                   | 155 |
| <i>Elective</i>                             | 77  |
| <i>Emergency</i>                            | 74  |
| Other                                       | 6   |

95

96

97 *Procedure*

98 The CoCoPIP survey comprises a mixed-methods approach, in which both quantitative and

99 qualitative data was collected. This survey is logic-dependent and adaptive, only showing

100 questions relevant to the parent’s current situation (i.e., first trimester/second trimester/infant

101 aged 0-3/3-6 months). For the full survey, response time was ~30 minutes and respondents

102 were included in a £100 gift card prize draw. As part of this survey, parents or caregivers



103 were asked to complete structured questions about delivery type and whether their partner  
104 and/or family were present during the birth (see *Table 2* for questions), alongside semi-  
105 structured questions focussed on their experience of giving birth during a pandemic (see  
106 *Table 3* for questions).

107

108 *Table 2: Structured questions about partner and/or family access to hospital during birth.*

Question

Prior to the birth, were you certain whether partners and/or family could be present for the birth?

Yes

I wasn't sure

No

Missing

Was the partner and/or family present for the birth?

Yes

No

No due to COVID-19 restrictions

109

110

111 *Table 3: Semi-structured questions asked to participants regarding their birthing experiences*

Question

Was the way you delivered your baby as you wanted to in your birth plan, or did it change?

Prior to the birth, were you certain whether partners and/or family could be present for the birth? If you like, let us know how this communication or advice from the hospital made you feel.

112

113

114 *Analysis*

115 Descriptive data is presented below in the form of frequencies. Quantitative analysis of the  
116 data involved a sentiment analysis. As with previous research (Aydin, Glasgow, et al., 2021),  
117 this was conducted manually. Responses to each question (see *Table 3*) were read and  
118 categorised as 'positive', 'negative' or 'neutral' by a single researcher (EA) and a cross check  
119 of 10% of the sentiment labels were conducted by a second researcher (KAG).

120

121 The qualitative data was imported from Qualtrics® via Redcap® (Harris et al., 2009) into  
122 NVivo 12 (QSR International) software. We adopted the same methodology used in previous  
123 qualitative research from the CoCoPIP study cohort (Aydin, Glasgow, et al., 2021). The  
124 coding trail was double checked by EA. Finally, confirmability was addressed by ensuring a  
125 clear presentation of participant responses, and by providing a clear rationale for each step  
126 involved in the methods and analysis; furthermore, an additional researcher (KAG)  
127 conducted a reliability analysis of 25% of the data to confirm the themes and sub-themes  
128 identified. It is important to note that any data reported as occurring ‘as a direct result of  
129 COVID-19 only’ includes answers where the individual explicitly referenced ‘COVID’,  
130 ‘pandemic’ or ‘PPE use’ in their response to the semi-structured questions asked (see *Table*  
131 *3*).

## 132 Results

133 Of the 477 participants who responded to questions regarding their birthing experiences  
134 during the pandemic, a third completed the survey during one of the three national lockdowns  
135 (39.5%, 188), around half completed the survey during the period of easing of restrictions  
136 (51.5%, 245) and a small percentage were completed during the introduction of a tiered  
137 system (9%, 43) (see *Figure 1* for timeline).

138

139

140 In our sample two-thirds of expectant women gave birth via spontaneous vaginal delivery  
141 (SVD) (66.1%, 315), a third delivered via CS (32.6%, 155), and ‘other’ (1.3%, 6) (see *Table*  
142 *1*). Of the 155 participants who reported giving birth by CS, just under half (49.7%, 77)  
143 reported having an elective/planned CS, with the remainder (47.7%; 74) having an  
144 emergency CS (4 participants did not report on whether their CS was an elective or  
145 emergency procedure).

146

147 A large proportion of respondents reported being uncertain about the restrictions relating to  
148 birthing partners (40.2%, 191), and a fifth reported that they were unaware prior to the birth  
149 whether birthing partners would be allowed to be present (14.9%, 71) (see *Table 2* for  
150 questions). At time of birth the majority of participants reported having their partner or a  
151 family member present (96.2%, 459), whilst a small number reported not being able to have  
152 anyone present at the birth (3.8%, 18) with 2.3% of these being due to COVID-19 related  
153 restrictions between 23<sup>rd</sup> March 2020 - 29<sup>th</sup> March 2021.

154

155 The results of the sentiment analysis showed that of the total responses across all questions (n  
156 = 706), 33.2% expressed positive, 19.9% neutral and 46.9% negative sentiments. When  
157 observing sentiment in relation to the governmental guidance and restrictions (see *Figure 1*  
158 *for timeline*) participants responses consistently showed a higher negative sentiment towards  
159 their birthing experiences during the first national lockdown (56.9%), ease of governmental  
160 guidance and restrictions, (43%) and tiered guidance system (42.6%). Relative to these  
161 periods, during the second and third national lockdowns, participants showed an almost equal  
162 number of negative (34.2%) and neutral (36.8%) sentiments during lockdown 2 and a more  
163 positive sentiment (50%) with regard to their birthing experiences during lockdown 3 (see  
164 *Figure 2*).

165

166

167

168

169

170

171

172 *Figure 2: Diagram of sentiment analysis reported by national guidance group at time of*  
 173 *birth.*

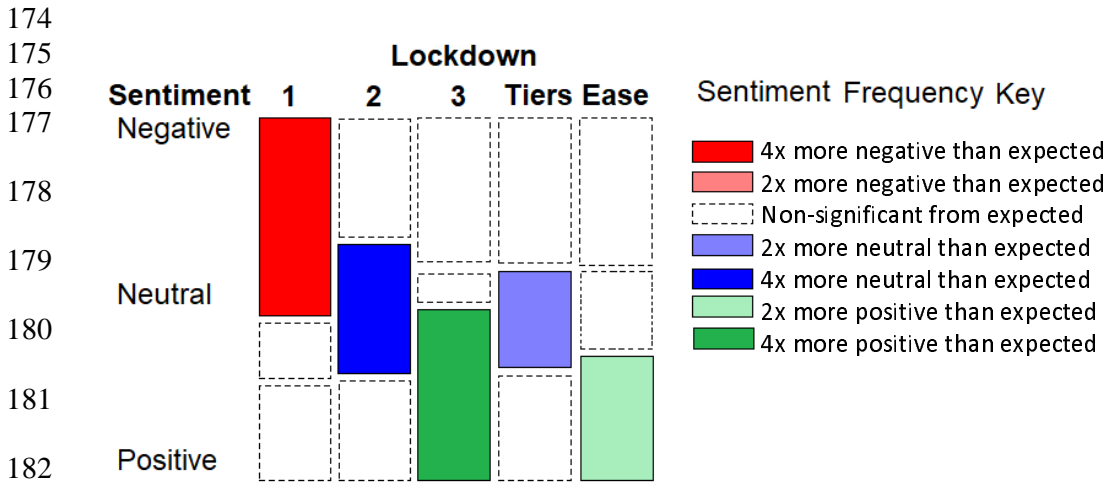

184 Of the 462 respondents who responded to the question ‘*Was the way you delivered your baby*  
 185 *as you wanted to in your birth plan, or did it change?* 37.4% (172) reported no changes to  
 186 their planned delivery (although it should be noted that some of these responses suggested  
 187 that no birth plan had been made as a result of the pandemic), 25% (115) reported changes to  
 188 the planned delivery due to COVID and 37.4% (172) reported changes due to other reasons  
 189 (e.g., changes in birth plan due to fetus being breech). Parents experiences of the COVID-  
 190 related changes are described below:

191

192 **No changes to delivery plan**

193 Although many parents across the UK experienced difficulties and hardships whilst giving  
 194 birth, some respondents to the survey reported their birthing experience going according to  
 195 their birthing plan, with parents recalling positive experiences in relation to the birth of their  
 196 child:

197 *‘My birthing experience was exactly how I’d planned/hoped. I had a very basic idea*  
 198 *of how I’d like to give birth but was very open to other options. I was lucky enough to*  
 199 *have a straight forward water birth with no complication’*

200 And

201 *'It was the way I wanted to. The birth experience was the most normal thing in the*  
202 *whole pregnancy'*

203

204 In addition to parents experiencing no changes to their birth plans, some participants  
205 described feeling supported and informed at the time of giving birth:

206 *'.... My birth plan was followed in that I was able to do and use the things I wanted*  
207 *and the staff knew that I was flexible should I need to be dependent on the situation*  
208 *that arose at the time.'*

209

210 Another participant referred to additional support offered due to previous birthing trauma:

211 *'Went exactly has[sic] planned and everyone was very calm and friendly due to*  
212 *previous birth trauma the year before.'*

213 However, a number of participants stated that there were no changes because birthing plans  
214 were not being made during national restrictions:

215 *'I was informed by my midwife that they were not making birthing plans during*  
216 *lockdown so I didn't have a plan.'*

217 While this was experienced well by some women - *'I had no birth plan so it all went how I*  
218 *would of liked it'* - other statements suggest that some women felt less clear about the impact  
219 of this:

220

221 *'I didn't really make a birth plan, my labour was led completely [b]y the midwife at*  
222 *the time. I decided it was best to go with the flow and not really make a plan. It was*  
223 *slow and long which ended in an emergency caesarean.'*

224

225 **COVID related changes to delivery**

226 One of the most notable COVID-related changes reported was the suspension of home births  
227 and birthing pools:

228 *‘Planned home water birth. All home births cancelled. All water births cancelled’*

229

230 *‘Big changes. I was induced, had an epidural [...], where I had wanted a water*  
231 *birth. My husband wasn't allowed to attend until my waters had been manually burst,*  
232 *which did influence me to say yes so that he could join me.’*

233

234 *‘Husband unable to attend induction or stay with baby & I after birth. Rushed*  
235 *hospital discharge, no visitors, PPE used by staff & I had to wear it whilst in labour*  
236 *too.*

237

238 This respondent went on to describe the feeling of being rushed and of having no control:

239 *Felt impersonal, rushed, somewhat out of control & birth options v limited (no*  
240 *access to birth centre or home birth). V[sic] different to what we had planned!’*

241

242 A number of respondents described being alone, and in one case, the cancellation of plans  
243 that had been developed to help prevent the reoccurrence of her postnatal depression:

244 *‘No one read my birth plan. I was alone for the majority of my labour. My birth*  
245 *partner was only allowed to join me right at the end.’*

246

247 *‘I was alone throughout the birthing experience. I couldn't have a water birth,*  
248 *couldn't have visitors. Most things planned to help reduce the reoccurrence of*  
249 *postnatal depression could not be put into place.’*

250

251 One respondent reported having trouble accessing the desired pain relief and assistance  
252 during her labour:

253 *‘It changed I was induced due to potential infection. And was unable to have the*  
254 *desired pain relief and staffing was low, and they didn't arrive in my very quick*  
255 *labour’*

256

257 These changes and restrictions resulted in some parents feeling considerable distress and  
258 anxiety:

259 *‘I wasn't allowed the birth I wanted because of covid. It was hugely traumatic [...]*

260

#### 261 **Non-COVID related changes to delivery**

262 Whilst changes to delivery can be expected when giving birth (e.g., *‘I was induced due to*  
263 *potential infection’*) women reported feelings of anxiety and distress with regard to these  
264 changes due to the lack of support and communication offered by hospitals:

265 *‘My birth plan changed as the baby was in a difficult position but as I was the last in*  
266 *my pregnancy group to give birth and 5/7 of them had had a c-section I was very*  
267 *worried I would have to have a c-section. In hospital it felt like it was my only option’*

268

269 These feelings were further exacerbated as a result of COVID-related restrictions to birthing  
270 support:

271 *‘I would have like[d] a natural labour but my body didn't go into labour. I suffered*  
272 *from PTSD from my [eldest's] birth where I was induced therefore it was advised I*  
273 *shouldn't be induced again. I spent a lot of time worrying about a situation where I*  
274 *might have had to be induced without my husband's support’.*

275

276 Some respondents who described changes to their delivery appeared to adapt well to the  
277 changes as a result of feeling supported and informed throughout their journey:

278 *‘Things did not go to plan, but I was kept informed, I was consulted on actions taken*  
279 *and my birth plan was considered throughout.’*

280

281 *‘Change of plan but staff in operation was amazing’.*

282

283 In addition to asking families to share their birthing experiences, we asked parents to reflect  
284 on the communication they had received prior to the birth of their baby regarding access to  
285 birthing partners during the delivery. We identified three key themes related to responses to  
286 this question (see *Table 3*, Q7, n = 250): (1) Communication, (2) Impact of fluctuating  
287 COVID-related guidance, (3) Anxiety and stress related to changing guidance.

288

### 289 **Communication**

290 The results revealed mixed responses in relation to communication from their hospital prior  
291 to the birth of their child. Some parents reported poor communication which added to  
292 feelings of anxiety:

293 *‘Communication was unclear, causing anxiety. As we have no family in this country, I*  
294 *asked a friend to be a back-up birth partner in case my partner should be barred for*  
295 *such a reason.’*

296

297 *‘Literally no communication from the hospital so had very little idea what to expect’*

298

299 Other parents reported having good communication from their hospital and midwives, in  
300 particular noting the use of social media platforms:



301 *‘Communication about procedure for spontaneous labour was very clear- used the*  
302 *very helpful midwife - patient liaison Facebook group’*

303

304 *‘My local hospital held a webinar with their midwives discussing what to expect at*  
305 *the birth with the new restrictions so I new[sic] exactly what to expect at [...]. They*  
306 *also answered any other worries or concerns I had on Facebook messenger. It was*  
307 *really helpful and reassuring.’*

308

### 309 **Impact of fluctuating COVID-related guidance**

310 The constant changes to the guidance and restrictions in relation to giving birth during  
311 COVID-19 was a major theme within responses related to communication received from the  
312 hospital prior to the birth of their child:

313 *‘It changed a lot in the build up to birth – as did restrictions on water birth etc. Was*  
314 *very aware that progress could be revoke[d] at any point’*

315

316 *‘Things were changing so quickly at the time midwives weren’t 100% sure’*

317

318 Many parents related the constant and fast changing nature of guidance as causing feelings of  
319 distress:

320 *‘The guidelines were changing almost daily. I felt scared and upset. On top of this I*  
321 *was unsure if anyone would be able to look after my son whilst I gave birth.’*

322

323 *‘Every time I asked the question I was told it could change right up until the morning*  
324 *of my c section - this made me very anxious’*

325

326 In addition to the changing rules and guidance, parents highlighted differences between the  
327 NHS trusts around COVID guidance and birth:

328 *‘As long as a positive test or symptoms aren't present. It was a concern that they*  
329 *wouldn't let my partner be present as restrictions were tighter than in other local*  
330 *hospitals’*

331

### 332 **Anxiety and stress related to changing guidance**

333 Many parents reported feelings of anxiety and distress related to not being confident that they  
334 would be able to have a birth partner present for the duration of their labour and birth:

335 *‘It was awful having no assurance that my partner could attend labour and post-*  
336 *labour. There's not much else to say except it was the #1 reason for my anxiety in the*  
337 *last few months of pregnancy.’*

338

339 *‘I was terrified my whole pregnancy that my husband wouldn't be able to be*  
340 *there...constant source of anxiety waiting for hospitals to update guidance’*

341

342 *‘Partner couldn't come to induction. I found it a really frightening, lonely*  
343 *experience.’*

344

345 However, the empathy with which this information was conveyed, appeared to have  
346 influenced at least one participant's response to this:

347 *‘At one point my midwife told me that I would have to be alone. This was a shock to*  
348 *me and I had a very emotional response. She was also upset by this. I appreciated*  
349 *that this was out of her control and that there was nothing she could do, I just really*  
350 *appreciated her empathic response, I felt less alone in that moment.’*

## 351 Discussion

352 Our study sought to identify the impact of giving birth amidst the changes in public health  
353 guidance that were instigated during the COVID-19 pandemic. The CoCoPIP survey  
354 provided new mothers with the opportunity to describe their experiences in their own words  
355 within the first 6 months following birth. Analyses compared expressed sentiment (i.e.,  
356 positive, negative and neutral) across lockdown conditions and coded the themes expressed  
357 by parents' open-ended responses, as well as describing the type of delivery, the presence of  
358 birthing partners, and changes in birth plan reported by our sample. To date, our study  
359 provides the largest sentiment analysis of birth experiences in the UK (Ayers, 2007).

360

361 Our results show that 32.6% of participants reported having a CS, of which 47.7% were  
362 elective. This represents a significant increase relative to pre-pandemic levels in which  
363 around one-quarter of deliveries were typically CS and one-third elective (NHS, 2019). At  
364 the start of the pandemic, there were reports that maternal requests for caesarean sections  
365 (MRCS) were under a blanket restriction (Romanis & Nelson, 2020). However this  
366 subsequently changed, with reports of expectant women in England and Wales opting to have  
367 a CS to ensure the presence of birthing partners at birth (Betteley, 2020). This was in  
368 response stories of partners being unable to reach the hospital in time for the 'active labour'  
369 portion of their baby's delivery (Betteley, 2020). Whilst the current study did not explicitly  
370 ask whether respondents elected to have a CS, our results indicated a higher-than-average  
371 rate of elective CS, despite the governmental guidance and restrictions in place, suggesting  
372 the presence of a partner might have been a potential motivation for this plan.

373

374 The results also show that just under half the total sample reported that they were unsure  
375 whether their birthing partner would be able to attend the delivery (40.2%), demonstrating

376 uncertainty around access to birth partners throughout the year of the pandemic. When asked  
377 to elaborate on how this communication (or lack of) from the hospital made expectant  
378 mothers feel (see Q7), a large proportion of individuals reported heightened levels of anxiety  
379 and distress. While NHS England has stated that guidance has been clear throughout the  
380 pandemic allowing partners to be present for childbirth, this was not always the case  
381 (Summers, 2020). For example, the Guardian reported in September 2020 that “three-  
382 quarters of NHS trusts are not allowing birth parents to support mothers” (Topping &  
383 Duncan, 2020). Within the NHS, each trust was able to issue their own policy, in particular  
384 those regarding access to birthing partners (Summers, 2020), leading to inconsistency and  
385 confusion across regions and among different expectant families. Our data highlights the way  
386 in which the changes in the rules and guidance surrounding birthing preferences and birth  
387 partners, not only nationally but between NHS trusts, created confusion and anxiety amongst  
388 families. This lack of clear guidance appears to have exacerbated existing feelings of stress  
389 and anxiety in women throughout their pregnancy (Aydin, Glasgow, et al., 2021), not only  
390 during childbirth.

391

392 The results of the sentiment analysis suggest that the fluctuations in guidance and the  
393 evolving crisis in terms of the provision of services to pregnant women, led to higher-than-  
394 typical (9.3%) reports of negative birth experiences (Rijnders et al., 2008; Smarandache et  
395 al., 2016). In our sample, the uncertainty that characterised the initial phase of lockdown  
396 seemed to exacerbate the frequency of negative experiences (Smarandache, Kim, Bohr, &  
397 Tamim, 2016).

398

399 Results from our thematic analysis support those of a survey conducted by Mumsnet and  
400 Birthrights between December 2019 – September 2020, which found that many women

401 reported that their decisions with regard to childbirth (e.g., water birth, delayed clamping)  
402 were not respected with many reporting their choice was either not considered or disregarded  
403 (Mumsnet & Birthrights, 2020). These changes, in addition to uncertainties with regard to  
404 access for the birthing partner throughout the pandemic were described as having led to  
405 heightened levels of anxiety and a negative childbirth experience.

406

407 The findings also suggest, however, that whilst changes to the birth were experienced by a  
408 large proportion of our sample, clear communication and support appeared to mitigate these  
409 negative childbirth experiences. These findings are consistent with the wider recognition that  
410 women's feelings and ability to exert choice and control during the birth, are more important  
411 in terms of long-term wellbeing, than the objective facts of the birth (Cook & Loomis, 2012).

412 It is also now recognised that post-traumatic stress disorder (PTSD) can occur following  
413 childbirth and has been found to be influenced by a number of significant factors, including  
414 some that were identified by the current study (i.e. negative aspects in staff-mother contact,  
415 feelings of loss of control over the situation, and lack of partner support) (Olde et al., 2006).

416 While we do not currently have data with regard to the incidence of PTSD following  
417 childbirth during the pandemic, this study found that when families were provided with  
418 support and the ability to control the decision-making about the overall birth (e.g., birth plan  
419 was followed or communication facilitated by midwives) families concurrently reported a  
420 more positive experience with reduced levels of anxiety and stress. Overwhelmingly,  
421 however, women reported negative birthing experiences when discussing (i) restrictions in  
422 terms of birthing method (i.e., no access to birthing pool or home births), (ii) no offer of  
423 support and communication by medical staff and/or (iii) dismissals of their decision with  
424 regard to how they wished to give birth.

425

426 *Limitations*

427 As data were collected between July 2020 – March 2021, participants experiences reflect a  
428 period of fluctuating COVID-related government and healthcare restrictions, from the most  
429 severe national lockdown measures to a combination of severe to mild national/local  
430 restrictions. Due to the rapidly evolving nature of the governmental guidance related to the  
431 pandemic and regional variations in between national lockdowns it, was not possible to  
432 collect equal sample sizes at each timepoint. Furthermore, as a result of the fact that this  
433 study was conducted as a voluntary online survey, we cannot confirm independently that all  
434 responses were by expectant parents or exclude bias in respondents with either positive or  
435 negative experience of giving birth. Whilst we advertised this study nationally and  
436 specifically worked with national childbirth trusts (NCTs) with an emphasis on areas of low  
437 socio-economic status (SES), the majority of participants were white; therefore, the results  
438 cannot be generalised to a more ethnically diverse population. Furthermore, while our sample  
439 was fairly representative of the UK’s population, there was an underrepresentation of Asian  
440 and South Asian parents. This study is part of an ongoing longitudinal study observing the  
441 impact of COVID-19 on pregnancy, infant development and parental mental health and we  
442 hope we increase the diversity of our sample as recruitment continues. Another limitation is  
443 that, of the two questions posed, not every participant gave a response to each one. Finally,  
444 from a qualitative perspective, due to the online survey nature of the project, it was not  
445 possible to probe by means of interviews, which would for example have helped us further  
446 elucidate the links between whether the existence of detailed guidance given by the trust  
447 influenced the birth accounts and contributed to the specific reasoning behind the change in  
448 birth plan.

449

450 *Implications for practice and research*

451 The mitigation measures implemented by the government and the NHS throughout the  
452 COVID-19 pandemic have had a significant secondary impact on expectant women and  
453 families. Going forward, these findings show the need for clear and consistent guidance to be  
454 in place for expectant women giving birth during subsequent lockdowns and any future  
455 public health crises. This should include allowances for choice of delivery methods as well as  
456 the availability of consistent support for the duration of the labour and birth.

457

458 Further research is needed to explore the impact of variation in birth experiences, both on  
459 maternal mental health in the postpartum period (Simpson & Catling, 2016), on maternal-  
460 infant attachment (Anderson & Cacola, 2017), and on subsequent maternal health and child  
461 development (Hernández-Martínez et al., 2020). Maternal recovery and bonding with their  
462 infants are particularly salient in light of the relative social isolation experienced by families  
463 during the pandemic.

464

465 *Conclusions*

466 Changes to birth experiences and offered support - in response to governmental guidance  
467 with regard to mitigating the spread of the virus and the increased burden on the healthcare  
468 system - has had an adverse effect on the experiences of many pregnant women in England.  
469 These findings reinforce the importance of the role of choice and control in women's  
470 childbirth experience. In addition, the findings demonstrate the need to ensure consistent  
471 guidance and support to better address the unique health care needs of each pregnant woman  
472 in any future lockdowns, as well as the need to observe the potential long-term impact on  
473 their offspring.

474

475 **List of abbreviations**

476 NHS: National Health Service

477 RCM: Royal College of Midwives

478 CS: Caesarean section

479 PTSD: Post-traumatic stress disorder

480

481

482

483

484

485

486

487

488 **Declarations**

489 **Ethics approval and consent to participate:** Ethics approval for the survey was given by  
490 the University of Cambridge, Psychology Research Ethics Committee (PREC)  
491 (PRE.2020.077).

492

493 **Consent for publication:** Not applicable.

494

495 **Availability of data and materials:** Qualitative data generated and analysed during the  
496 study will not be made publicly available due to ethical and privacy restrictions, however  
497 researchers can submit a research proposal to the Data Sharing Management Committee to  
498 request access and collaboration.

499



500 **Competing interests:** The authors have no potential conflicts of interest to disclose.

501

502 **Funding source:** This research was funded by a Medical Research Council Programme  
503 Grant MR/T003057/1 to MJ, and a UKRI Future Leaders fellowship (grant MR/S018425/1)  
504 to SLF. The views expressed are those of the authors and not necessarily those of the MRC or  
505 the UKRI. T.A. is supported by the NIHR Cambridge Biomedical Research Centre (BRC).  
506 The NIHR Cambridge Biomedical Research Centre (BRC) is a partnership between  
507 Cambridge University Hospitals NHS Foundation Trust and the University of Cambridge,  
508 funded by the National Institute for Health Research (NIHR), TA is also supported by the  
509 NIHR Brain Injury MedTech Co-operative. The views expressed are those of the author(s)  
510 and not necessarily those of the NIHR or the Department of Health and Social Care.

511

512 **Acknowledgements:** We are extremely grateful to all those families who gave their time to  
513 participate and to Esther Adememo and Maddie Walton who worked on the CoCoPIP study  
514 during their undergraduate studies at Cambridge.

515

516 **Author statement:** **Ezra Aydin:** Conceptualization, Methodology, Investigation, Data  
517 Curation, Formal Analysis, Validation, Writing - Original Draft. **Staci M. Weiss:**  
518 Conceptualization, Methodology, Formal Analysis, Visualizing, Writing - Review & Editing.  
519 **Zahra Khan:** Investigation, Data Curation, Validation. **Kevin A. Glasgow:** Investigation,  
520 Data Curation, Formal Analysis, Writing – Review & Editing. **Topun Austin:** Methodology,  
521 Supervision, Writing - Review & Editing. **Mark Johnson:** Supervision, Funding acquisition,  
522 Writing - Review & Editing. **Jane Barlow:** Supervision, Writing - Review & Editing. **Sarah**  
523 **Lloyd-Fox:** Conceptualization, Methodology, Supervision, Funding acquisition, Writing -  
524 Review & Editing

525

526

527

528

529

530

531

532

533

534

535

## 536 References

537

538 Anderson, C., & Cacola, P. (2017). Implications of Preterm Birth for Maternal Mental Health

539 and Infant Development. *MCN. The American Journal of Maternal Child Nursing*,

540 42(2), 108–114. <https://doi.org/10.1097/NMC.0000000000000311>

541 Aydin, E., Glasgow, K. A., Weiss, S., Austin, T., Johnson, M., Barlow, J., & Lloyd-Fox, S.

542 (2021). *Expectant parents' perceptions of healthcare and support during COVID-19*

543 *in the UK: A thematic analysis*. [Preprint]. Public and Global Health.

544 <https://doi.org/10.1101/2021.04.14.21255490>

545 Aydin, E., Weiss, S. M., Glasgow, K. A., Barlow, J., Austin, T., Johnson, M. H., & Lloyd-

546 Fox, S. (2021). *The COVID in the Context of Pregnancy, Infancy and Parenting*

547 *(CoCoPIP) Study: Protocol for a longitudinal study of parental mental health, social*

548 *interactions, physical growth, and cognitive development of infants during the*

549 *pandemic*. [Preprint]. Health Policy. <https://doi.org/10.1101/2021.05.22.21257649>

- 550 Ayers, S. (2007). Thoughts and Emotions During Traumatic Birth: A Qualitative Study.  
551 *Birth*, 34(3), 253–263. <https://doi.org/10.1111/j.1523-536X.2007.00178.x>
- 552 Betteley, C. (2020, September 26). *Covid: Pregnant women ‘opt for C-section’ to ensure*  
553 *partners at birth*. <https://www.bbc.co.uk/news/uk-wales-54263166>
- 554 Cook, K., & Loomis, C. (2012). The Impact of Choice and Control on Women’s Childbirth  
555 Experiences. *The Journal of Perinatal Education*, 21(3), 158–168.  
556 <https://doi.org/10.1891/1058-1243.21.3.158>
- 557 Davis, N. (2020, March 27). *NHS trusts begin suspending home births due to coronavirus*.
- 558 Greenfield, M., Payne-Gifford, S., & McKenzie, G. (2021). Between a Rock and a Hard  
559 Place: Considering “Freebirth” During Covid-19. *Frontiers in Global Women’s*  
560 *Health*, 2, 603744. <https://doi.org/10.3389/fgwh.2021.603744>
- 561 Harris, P. A., Taylor, R., Thielke, R., Payne, J., Gonzalez, N., & Conde, J. G. (2009).  
562 Research electronic data capture (REDCap)—A metadata-driven methodology and  
563 workflow process for providing translational research informatics support. *Journal of*  
564 *Biomedical Informatics*, 42(2), 377–381. <https://doi.org/10.1016/j.jbi.2008.08.010>
- 565 Hernández-Martínez, A., Rodríguez-Almagro, J., Molina-Alarcón, M., Infante-Torres, N.,  
566 Rubio-Álvarez, A., & Martínez-Galiano, J. M. (2020). Perinatal factors related to  
567 post-traumatic stress disorder symptoms 1-5 years following birth. *Women and Birth:*  
568 *Journal of the Australian College of Midwives*, 33(2), e129–e135.  
569 <https://doi.org/10.1016/j.wombi.2019.03.008>
- 570 Mayopoulos, G. A., Ein-Dor, T., Dishy, G. A., Nandru, R., Chan, S. J., Hanley, L. E.,  
571 Kaimal, A. J., & Dekel, S. (2021). COVID-19 is associated with traumatic childbirth  
572 and subsequent mother-infant bonding problems. *Journal of Affective Disorders*, 282,  
573 122–125. <https://doi.org/10.1016/j.jad.2020.12.101>

- 574 Mumsnet & Birthrights. (2020). *A quarter of mothers say their decisions were not respected*  
575 *when giving birth*. <https://www.birthrights.org.uk/news/press/>
- 576 Nelson, A., & Romanis, E. C. (2020, April 2). Home-Birthing and Free-Birthing in the era of  
577 COVID-19. *BMJ Sexual and Reproductive Health*.
- 578 NHS. (2019). *Maternity Services Monthly Statistics June 2019, experimental statistics*.  
579 [https://digital.nhs.uk/data-and-information/publications/statistical/maternity-services-](https://digital.nhs.uk/data-and-information/publications/statistical/maternity-services-monthly-statistics/june-2019)  
580 [monthly-statistics/june-2019](https://digital.nhs.uk/data-and-information/publications/statistical/maternity-services-monthly-statistics/june-2019)
- 581 NHS. (2020). *Supporting Pregnant women using maternity service during the coronavirus*  
582 *pandemic: Actions for NHS providers*.
- 583 Olde, E., Vanderhart, O., Kleber, R., & Vanson, M. (2006). Posttraumatic stress following  
584 childbirth: A review. *Clinical Psychology Review*, 26(1), 1–16.  
585 <https://doi.org/10.1016/j.cpr.2005.07.002>
- 586 Regan, A. (2020, September 26). *Coronavirus: The fight to get partners back into maternity*  
587 *wards*. <https://www.bbc.co.uk/news/uk-england-54209927>
- 588 Rijnders, M., Baston, H., Schönbeck, Y., van der Pal, K., Prins, M., Green, J., & Buitendijk,  
589 S. (2008). Perinatal factors related to negative or positive recall of birth experience in  
590 women 3 years postpartum in the Netherlands. *Birth (Berkeley, Calif.)*, 35(2), 107–  
591 116. <https://doi.org/10.1111/j.1523-536X.2008.00223.x>
- 592 Romanis, E. C., & Nelson, A. (2020). Maternal request caesareans and COVID-19: The virus  
593 does not diminish the importance of choice in childbirth. *Journal of Medical Ethics*,  
594 46(11), 726–731. <https://doi.org/10.1136/medethics-2020-106526>
- 595 Royal College of Midwives. (2020, March 29). *RCM Please: Help us deliver safe care for*  
596 *pregnant women*. [https://www.rcm.org.uk/media-releases/2020/march/rcm-plea-help-](https://www.rcm.org.uk/media-releases/2020/march/rcm-plea-help-us-deliver-safe-care-for-pregnant-women/)  
597 [us-deliver-safe-care-for-pregnant-women/](https://www.rcm.org.uk/media-releases/2020/march/rcm-plea-help-us-deliver-safe-care-for-pregnant-women/)

- 598 Royal College of Obstetricians and Gynaecologists, Royal College of Midwives, Society and  
599 College of Radiographers, & NHS. (2020). *Framework to assist NHS trusts to*  
600 *reinroduce access for partners, visitors and other supporters of pregnant women in*  
601 *English maternity services.*  
602 [http://allcatsrgrey.org.uk/wp/download/midwifery/par001599-framework-for-the-](http://allcatsrgrey.org.uk/wp/download/midwifery/par001599-framework-for-the-reintroduction-of-visitors-throughout-maternity-services-sep-2020.pdf)  
603 [reintroduction-of-visitors-throughout-maternity-services-sep-2020.pdf](http://allcatsrgrey.org.uk/wp/download/midwifery/par001599-framework-for-the-reintroduction-of-visitors-throughout-maternity-services-sep-2020.pdf)
- 604 San Francisco: Human Rights in Childbirth. (2020). *Human Rights Violations in Pregnancy,*  
605 *Birth and Postpartum During the COVID-19 Pandemic.*
- 606 Sherwood, H. (2020, March 29). *Midwife shortage doubles as NHS staff diverted to tend*  
607 *Covid-19 patients.*
- 608 Simpson, M., & Catling, C. (2016). Understanding psychological traumatic birth experiences:  
609 A literature review. *Women and Birth: Journal of the Australian College of Midwives,*  
610 *29(3), 203–207.* <https://doi.org/10.1016/j.wombi.2015.10.009>
- 611 Smarandache, A., Kim, T. H. M., Bohr, Y., & Tamim, H. (2016). Predictors of a negative  
612 labour and birth experience based on a national survey of Canadian women. *BMC*  
613 *Pregnancy and Childbirth, 16(1), 114.* <https://doi.org/10.1186/s12884-016-0903-2>
- 614 Summers, H. (2020, December 5). ‘*Women feel they have no option but to give birth alone*’:  
615 *The rise of freebirthing.*  
616 [https://www.theguardian.com/lifeandstyle/2020/dec/05/women-give-birth-alone-the-](https://www.theguardian.com/lifeandstyle/2020/dec/05/women-give-birth-alone-the-rise-of-freebirthing)  
617 [rise-of-freebirthing](https://www.theguardian.com/lifeandstyle/2020/dec/05/women-give-birth-alone-the-rise-of-freebirthing)
- 618 Topping, A., & Duncan, P. (2020, September 25). *Only 23% of NHS trusts letting birth*  
619 *partners stay for whole of labour.*  
620 [https://www.theguardian.com/society/2020/sep/25/only-23-of-nhs-trusts-letting-birth-](https://www.theguardian.com/society/2020/sep/25/only-23-of-nhs-trusts-letting-birth-partners-stay-for-whole-of-labour-covid)  
621 [partners-stay-for-whole-of-labour-covid](https://www.theguardian.com/society/2020/sep/25/only-23-of-nhs-trusts-letting-birth-partners-stay-for-whole-of-labour-covid)

622 Walsh, S., Simmons-Jones, F., & Best, R. (2020). Care during covid-19: Partner attendance

623 at maternity services. *BMJ*, m3973. <https://doi.org/10.1136/bmj.m3973>

624

625

626
